# Supplementary material for: Projection Micro-Stereolithography to Manufacture a Biocompatible Micro-Optofluidic Device for Cell Concentration Monitoring
Source: MDPI journal article supplement (doi:10.3390/polym15224461), 2023-11-19
Supplement: s1 [file s1]

Article

# Projection Micro-Stereolithography to Manufacture a Biocompatible Micro-Optofluidic Device for Cell Concentration Monitoring

Lorena Saitta <sup>1,\*</sup>, Emanuela Cutuli <sup>2,\*</sup>, Giovanni Celano <sup>1</sup>, Claudio Tosto <sup>1</sup>, Dario Sanalidro <sup>2</sup>, Francesca Guarino <sup>3</sup>, Gianluca Cicala <sup>1,4</sup> and Maide Bucolo <sup>2</sup>

<sup>1</sup> Department of Civil Engineering and Architecture, University of Catania, Via Santa Sofia 64, 95125 Catania, Italy; giovanni.celano@unict.it (G.C.); claudio.tosto@unict.it (C.T.); gianluca.cicala@unict.it (G.C.)

<sup>2</sup> Department of Electrical Electronic and Computer Science Engineering, University of Catania, Via Santa Sofia 64, 95125 Catania, Italy; dario.sanalidro@unict.it (D.S.); maide.bucolo@unict.it (M.B.)

<sup>3</sup> Department of Biomedical and Biotechnological Science, University of Catania, Via Santa Sofia 89, 95123 Catania, Italy; francesca.guarino@unict.it

<sup>4</sup> INSTM-UDR CT, Viale Andrea Doria 6, 95125 Catania, Italy

\* Correspondence: lorena.saitta@phd.unict.it (L.S.); emanuela.cutuli@phd.unict.it (E.C.)

† These authors contributed equally to this work.

**Keywords:** 3D printing; vat photopolymerization; photocurable biocompatible resins; micro-optics; microfluidics; two-phase flow detection; cell concentration detection

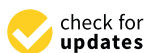

**Citation:** Saitta, L.; Cutuli, E.; Celano, G.; Tosto, C.; Sanalidro, D.; Guarino, F.; Cicala, G.; Bucolo, M. Projection Micro-Stereolithography to Manufacture a Biocompatible Micro-Optofluidic Device for Cell Concentration Monitoring. *Polymers* **2023**, *15*, 4461. <https://doi.org/10.3390/polym15224461>

Academic Editor: Qinghua Wei

Received: 14 October 2023

Revised: 15 November 2023

Accepted: 16 November 2023

Published: 19 November 2023

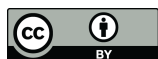

**Copyright:** © 2023 by the authors. Licensee MDPI, Basel, Switzerland. This article is an open access article distributed under the terms and conditions of the Creative Commons Attribution (CC BY) license (<https://creativecommons.org/licenses/by/4.0/>).

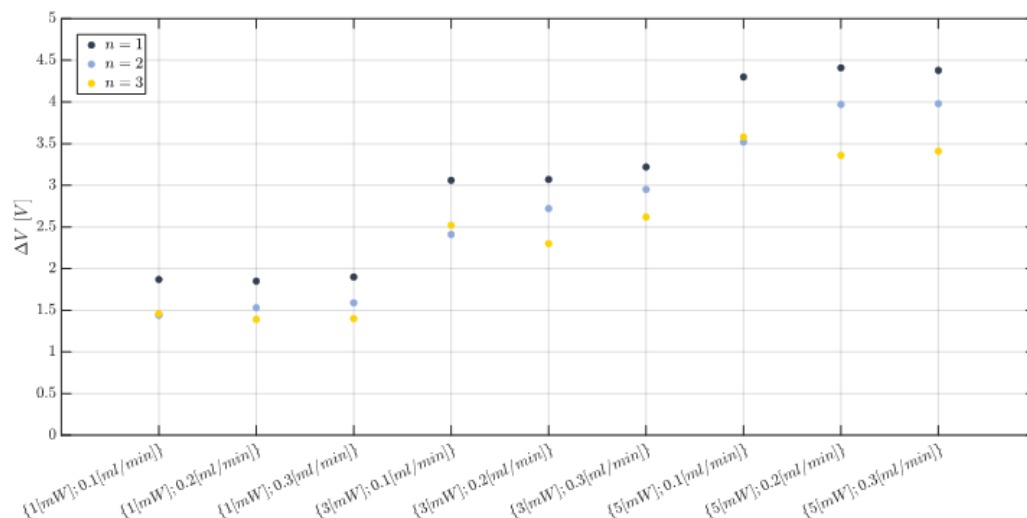

**Figure S 1.** Individual value plot related to the voltage difference ( $\Delta V$ ) collected observations for the BIO device at each investigated working condition (see Table 3) and replication ( $n = 1, 2, 3$ ).

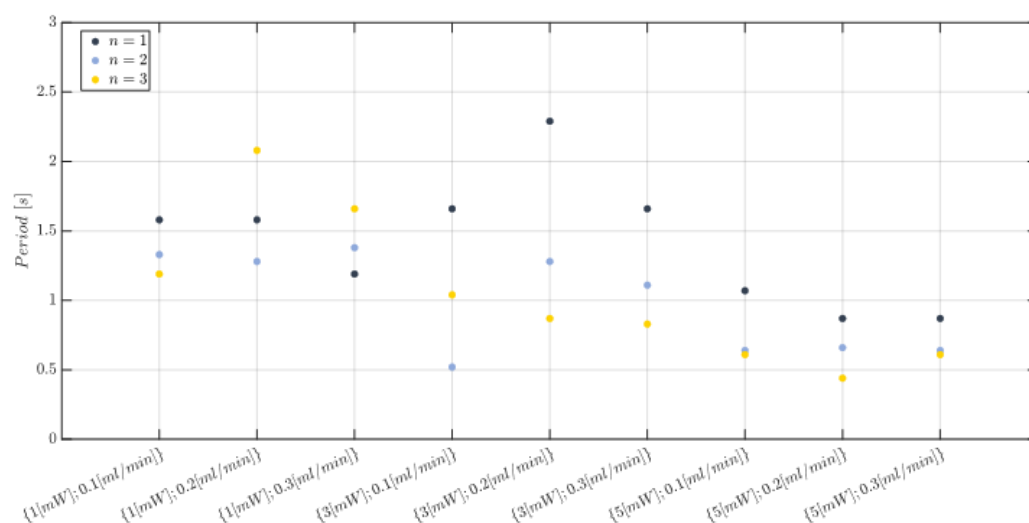

**Figure S 2.** Individual value plot related to the mean period ( $T$ ) related to a complete air-water two-phase flow passage collected observations for the BIO device at each investigated working condition (see Table 3) and replication ( $n = 1, 2, 3$ ).

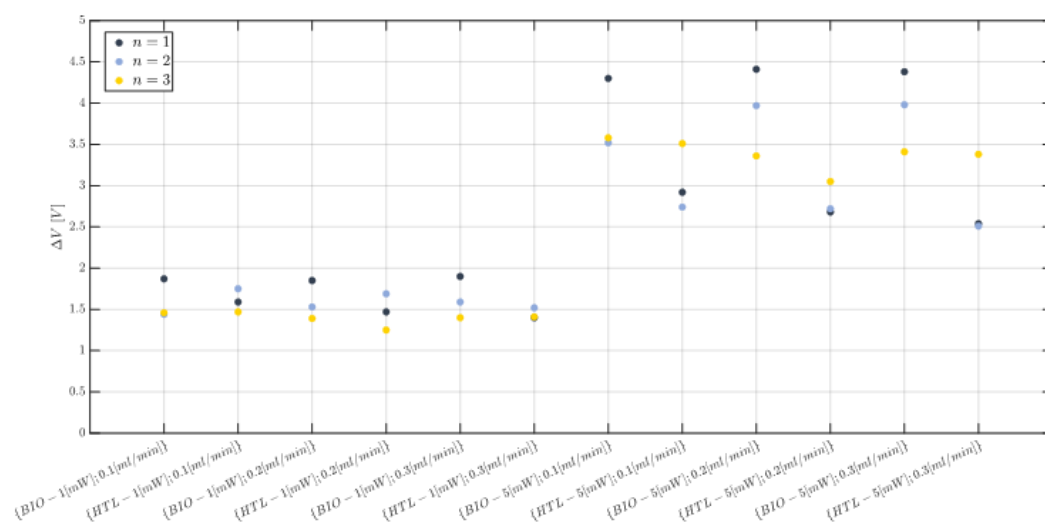

**Figure S 3.** Individual value plot related to the voltage difference ( $\Delta V$ ) collected observations for the BIO and HTL devices at each investigated working condition (see Table 4) and replication ( $n = 1, 2, 3$ ).

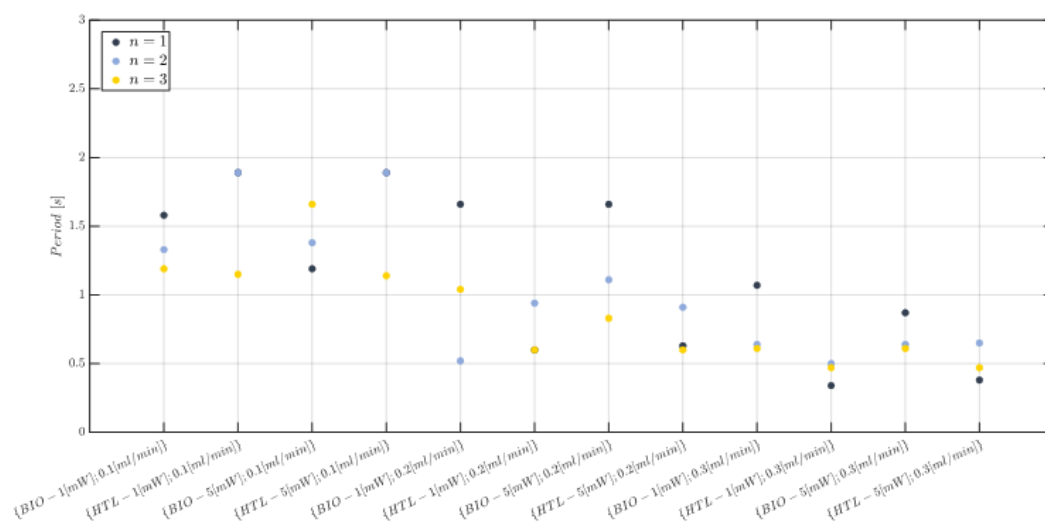

**Figure S 4.** Individual value plot related to the mean period ( $T$ ) related to a complete air-water two-phase flow passage collected observations for the BIO and HTL devices at each investigated working condition (see Table 4) and replication ( $n = 1, 2, 3$ ).

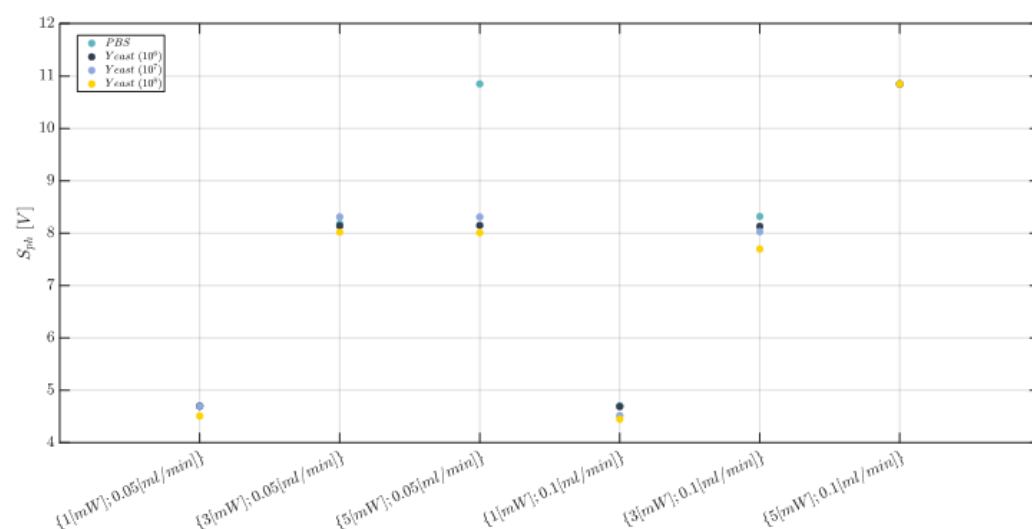

**Figure S 5.** Individual value plot related to the mean voltage value ( $S_{ph}$ ) collected observations for the BIO device at each investigated working condition (see Table 5) and replication ( $n = 1, 2, 3$ ).

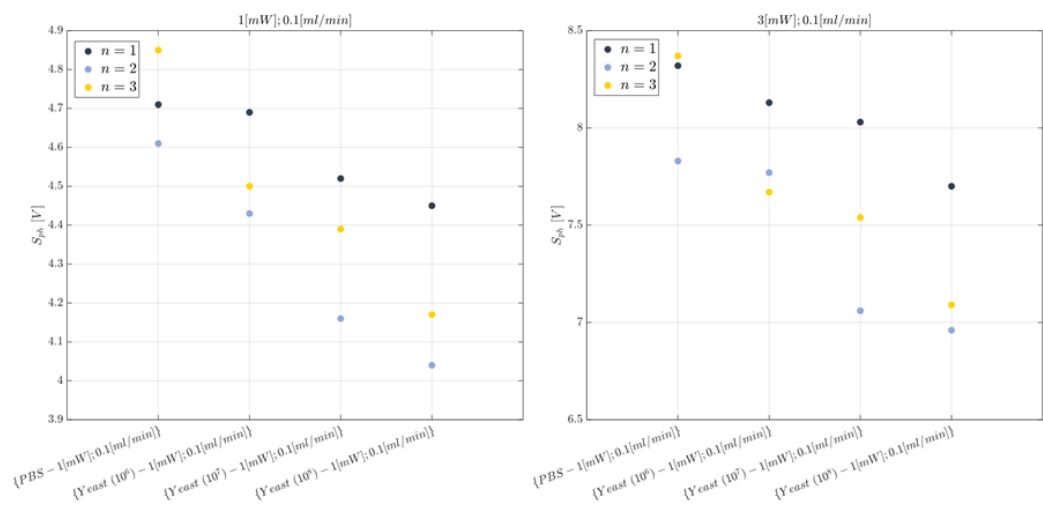

**Figure S 6.** Individual value plot related to the mean voltage value ( $S_{ph}$ ) collected observations for the BIO device at each investigated working condition (see Table 10) and replication ( $n = 1, 2, 3$ ).
